# Supplementary material for: Antibiotic-induced population fluctuations and stochastic clearance of bacteria
Source: eLife journal article supplement (doi:10.7554/elife.32976), 2018-03-05
Supplement: supp [file elife_poa_e32976_Figure_1_source_data_1.xlsx]

## Sheet: Fig.1
	First plating				First plating			Second plating
	Antibiotic concentration in MIC	plating efficiency			Antibiotic concentration in MIC	plating efficiency		plating efficiency
Chloramphenicol	0	1		Ofloxacin	0	1		1
	0.14286	0.95858			0.2	1.05227		1.00755
	0.28571	1.10651			0.4	0.9415		0.79245
	0.42857	0.97041			0.6	0.4298		0.64151
	0.57143	0.88639			0.8	0.15973		0.38491
	0.71429	0.92308			1	0		0.03019
	0.85714	0.75148
	1	0		Kanamycin	0	1		1
					0.14286	0.99103		0.73603
Tetracycline	0	1			0.28571	0.67383		0.69171
	0.11719	0.96293			0.42857	0.43432		0.14066
	0.25	0.95399			0.57143	0.26017		0.01734
	0.35156	0.98224			0.71429	0.12416		0.00963
	0.5	1.09573			0.85714	0.01121		0.00385
	0.58594	0.98597			1	0		0
	0.75	0.88409
	0.82031	0.84013		6-APA	0	1		1
	1	0			0.2	1.06662		0.93103
					0.4	1.0265		0.97764
Thiolutin	0	1			0.6	0.89471		--
	0.2	0.9056			0.8	0.22372		0.48907
	0.4	0.9633			1	0.00106		0
	0.6	0.98431			--	--
	0.8	0.93272		Ciprofloxacin	0	1		1
	1	0			0.2	1.03724		0.88958
					0.4	0.93866		0.86016
Erythromycin	0	1			0.6	0.35989		0.48592
	0.23077	1			0.8	0.02837		0.3721
	0.46154	0.9203			1	0		0.01184
	0.76923	0.85249			--	--
	1	0		Rifampicin	0	1		1
	--	--			0.2	0.82585		0.59857
					0.4	0.2569		0.11823
					0.6	0.10557		0.00175
					0.8	0.02676		0
					1	0.0067		0
					--	--
				Cefsulodin	0	1		1
					0.16	0.92593		0.90978
					0.32	0.71339		0.86304
					0.48	0.84104		0.6663
					0.64	0.82407		0.21141
					0.8	0.57092		0
					0.96	0.22491		0
					1	0		0
					--	--
				Vancomycin	0	1		1
					0.2	0.73717		1.07203
					0.4	0.71142		0.55474
					0.6	0.35764		0.35036
					0.8	0.24089		0.08029
					1	0		0.05839
				Streptomycin	0	1		1
					0.14286	0.94716		0.73911
					0.28571	1.07158		--
					0.42857	0.90719		0.24775
					0.57143	0.49792		--
					0.71429	0.50957		0.1592
					0.85714	0.0137		0.06515
					1	0		0
