# Supplementary material for: Antibiotic-induced population fluctuations and stochastic clearance of bacteria
Source: eLife journal article supplement (doi:10.7554/elife.32976), 2018-03-05
Supplement: supp [file elife_poa_e32976_Figure_2_source_data_1.xlsx]

## Sheet: Fig. 2
Fig. 2A	Time	Number of cells
no antibiotics	0	1	1	1	1	1	1	1	1	1	1	1	1	1
	48	4	4	3	4	2	4	3	2	4	5	4	4	4
	63	8	5	4	6	4	8	4	4	7	8	7	4	4
	78	10	8	8	8	6	12	8	8	8	12	8	8	8
	93	17	13	8	15	8	16	15	8	15	15	14	11	15
	108	26	18	16	21	11	28	17	15	21	27	18	16	17
	123	34	30	25	25	16	35	23	18	26	40	30	27	32
	138	57	40	33	43	25	48	33	30	54	59	47	38	40
	153	68	61	53	69	48	67	46	42	62	59	71	50	57
	168	101	86	72	93	85	94	67	53	77	93	106	67	70
	183	161	126	99	120	91	130	91	79	102	114	133	105	98
Fig. 2B
Chloramphenicol	0	1	1	1	1	1	1	1	1	1	1	1
	90	2	2	1	1	2	2	2	1	2	2	2
	105	2	2	1	2	2	2	2	2	2	2	2
	120	2	2	2	2	2	2	2	2	2	2	2
	135	2	2	2	2	2	2	2	3	3	3	2
	150	2	3	3	2	3	4	2	3	3	3	3
	165	2	3	4	2	4	4	2	4	4	3	3
	180	4	4	4	2	4	4	2	5	6	5	3
	195	4	6	6	4	6	7	4	6	6	6	5
	210	4	6	8	4	7	8	4	8	9	8	6
	225	4	9	8	5	8	8	6	8	12	8	6
	240	7	12	13	6	12	14	8	12	13	10	11
	255	8	12	16	7	13	15	11	14	20	15	12
	270	8	17	20	9	16	20	14	19	22	19	14
	285	15	21	24	16	19	30	17	24	30	21	20
	300	17	27	29	17	21	36	22	27	37	27	22
	315	23	36	45	23	30	49	25	39	44	32	31
	330	28	45	51	28	37	50	29	41	58	45	37
	345	36	60	64	39	46	61	40	50	69	53	46
	360	44	64	74	46	62	72	45	64	83	67	58
	375	52	68	76	57	83	98	59	71	104	89	73
	390	72	89		69	94	122	70	105	124	109	81
	405	78	120		79	136	135	93	136		137	119
	420	95	132		108	167	170	129	168		172
Fig. 2C
Cefsulodin	0	1	1	1	1	1	1	1	1	1	1	1	1	1	1	1
	95	6	8	9	9	7	6	8	3	11	7	6	3	5	4	7
	110	8	10	13	10	12	10	9	2	6	8	10	0	7	5	8
	125	6	12	14	17	13	10	4	3	7	5	11	0	5	4	8
	140	8	6	10	15	16	8	7	2	4	7	6	0	6	3	5
	155	8	9	6	13	20	10	6	3	4	7	9	0	5	7	5
	170	7	12	5	10	21	5	3	3	5	3	5	0	3	7	6
	185	8	7	4	9	17	4	1	5	6	4	6	0	0	8	5
	200	11	12	6	8	15	2	0	3	7	4	3	0	0	12	4
	215	11	8	7	6	8	1	0	2	6	6	1	0	0	16	6
	230	13	10	11	4	2	2	0	1	3	5	0	0	0	15	4
	245	15	11	7	5	0	0	0	0	6	5	0	0	0	12	5
	260	9	13	6	6	0	0	0	0	5	3	0	0	0	18	6
	275	5	18	9	8	0	0	0	0	10	1	0	0	0	20	4
	290	9	20	13	8	0	0	0	0	15	0	0	0	0	22	5
	305	10	25	9	7	0	0	0	0	19	0	0	0	0	26	6
	320	7	31	16	6	0	0	0	0	15	0	0	0	0	31	8
	335	12		16	4	0	0	0	0	20	0	0	0	0		9
	350	16		17	3	0	0	0	0	25	0	0	0	0		9
	365	10		27	2	0	0	0	0	26	0	0	0	0		10
	380	9		30	1	0	0	0	0	28	0	0	0	0		15
	395	11			0	0	0	0	0	33	0	0	0	0		11
	410	8			0	0	0	0	0	39	0	0	0	0		16
	425	5			0	0	0	0	0	35	0	0	0	0		16
	440	5			0	0	0	0	0	33	0	0	0	0		19
	455	6			0	0	0	0	0	45	0	0	0	0
	470	8			0	0	0	0	0	45	0	0	0	0
	485	10			0	0	0	0	0	54	0	0	0	0
Fig. 2D
	death rate	Extinction Probability		death rate	Extinction Probability		death rate	Extinction Probability
Cefsulodin	0	0	Ofloxacin	0	0	6-APA	0	0
	0.25193	0.11		0.55642	0.5636		0.5843	0.3607
	1.03244	0.43		1.41556	0.7609		0.55611	0.66
	0.54431	0.48		1.57543	0.9261		0.78487	0.75
	0.79768	0.77		--	--
	1.66355	0
