# Supplementary material for: Antibiotic-induced population fluctuations and stochastic clearance of bacteria
Source: eLife journal article supplement (doi:10.7554/elife.32976), 2018-03-05
Supplement: supp [file elife_poa_e32976_Figure_3_source_data_1.xlsx]

## Sheet: Fig. 3
Fig. 3A	Time	Number of cells
Cefsulodin	0	1	1	1	1	1	1	1	1	1	1	1	1	1	1	1
	72	1	2	5	3	2	2	7	4	3	4	4	5	3	2	3
	87	2	2	6	4	1	2	7	4	4	4	4	5	3	2	3
	102	2	2	6	3	1	2	7	4	2	3	2	5	3	2	2
	117	2	2	5	3	2	2	6	5	2	5	0	4	4	2	1
	132	4	1	5	2	1	0	6	6	2	5	0	2	4	1	2
	147	3	1	3	1	1	0	6	3	3	6	0	3	4	1	1
	162	4	2	1	0	1	0	5	3	1	4	0	4	3	0	1
	177	5	2	0	0	0	0	4	4	1	3	0	3	2	0	1
	192	4	2	0	0	0	0	3	5	1	2	0	2	2	0	1
	207	4	1	0	0	0	0	3	6	1	2	0	2	2	0	0
	222	3	1	0	0	0	0	2	4	1	2	0	3	2	0	0
	237	4	1	0	0	0	0	4	3	1	0	0	3	1	0	0
	252	8	1	0	0	0	0	6	2	0	0	0	3	0	0	0
	267	5	1	0	0	0	0	4	1	0	0	0	1	0	0	0
	282	4	1	0	0	0	0	5	2	0	0	0	1	0	0	0
	297	4	1	0	0	0	0	5	2	0	0	0	1	0	0	0
	312	3	1	0	0	0	0	6	0	0	0	0	1	0	0	0
	327	1	0	0	0	0	0	8	0	0	0	0	1	0	0	0
	342	1	0	0	0	0	0	10	0	0	0	0	1	0	0	0
	357	1	0	0	0	0	0	6	0	0	0	0	1	0	0	0
	372	0	0	0	0	0	0	7	0	0	0	0	1	0	0	0
	387	0	0	0	0	0	0	5	0	0	0	0	1	0	0	0
	402	0	0	0	0	0	0	5	0	0	0	0	1	0	0	0
	417	0	0	0	0	0	0	5	0	0	0	0	1	0	0	0
	432	0	0	0	0	0	0	4	0	0	0	0	1	0	0	0
	447	0	0	0	0	0	0	2	0	0	0	0	1	0	0	0
	462	0	0	0	0	0	0	2	0	0	0	0	1	0	0	0
	477	0	0	0	0	0	0	0	0	0	0	0	0	0	0	0
	492	0	0	0	0	0	0	0	0	0	0	0	0	0	0	0
	507	0	0	0	0	0	0	0	0	0	0	0	0	0	0	0
	Time	Ofloxacin	Cefsulodin	6-APA
Fig. 3B	0	44	60	54
	25	43	60	54
	50	40	60	54
	75	39	60	54
	100	36	60	54
	125	34	55	54
	150	28	39	51
	175	20	30	44
	200	14	19	43
	225	12	14	30
	250	9	11	16
	275	9	8	11
	300	5	7	7
	325	5	5	4
	350	4	4	3
	375	4	2	3
	400	2	2	2
	425	2	1	2
	450	1	0	1
	475	0	0	0
Fig. 3D
Cefsulodin		23	25	27	29	31	33	35	37
	20480	0	0	0	0	0	0	0.08333	1
	10240	0	0	0	0	0	0	0.16667	1
	5120	0	0	0	0	0	0	0.58333	1
	2560	0	0	0	0	0.08333	0	0.75	1
	1280	0	0	0	0	0.16667	0.08333	1	1
	640	0	0	0	0	0.25	0.41667	1	1
	320	0	0	0	0	0.33333	0.58333	1	1
	160	0	0	0	0	0.41667	0.91667	1	1
	80	0	0	0	0	0.75	1	1	1
	40	0	0	0.08333	0.25	0.91667	1	1	1
	20	0	0	0.33333	0.58333	0.83333	1	1	1
	10	0	0.16667	0.25	0.91667	1	1	1	1
	5	0	0.33333	0.66667	0.91667	1	1	1	1
Ofloxacin		0.08	0.1	0.12	0.14	0.16
	20480	0	0	0	0.41667	1
	10240	0	0	0	0.58333	1
	5120	0	0	0	0.5	1
	2560	0	0	0	0.66667	1
	1280	0	0	0.16667	0.75	1
	640	0	0	0.25	0.91667	1
	320	0	0	0.25	1	1
	160	0	0	0.41667	1	1
	80	0	0	0.66667	1	1
	40	0	0	0.83333	1	1
	20	0	0	0.83333	1	1
	10	0	0.08333	0.75	1	1
	5	0.08333	0.41667	0.83333	1	1
		12	14	16	18	20	22
6-APA	20480	0	0	0	0	0	0.33333
	10240	0	0	0	0.33333	0.5	0.75
	5120	0	0	0	0.5	0.75	1
	2560	0	0	0	0.58333	0.91667	1
	1280	0	0	0.16667	0.66667	0.91667	1
	640	0	0	0.33333	1	1	1
	320	0	0	0.5	1	1	1
	160	0	0.08333	0.83333	1	1	1
	80	0	0.16667	0.91667	1	1	1
	40	0	0.66667	1	1	1	1
	20	0	0.75	1	1	1	1
	10	0.33333	0.91667	1	1	1	1
	5	0.5	1	1	1	1	1
