# Supplementary material for: Antibiotic-induced population fluctuations and stochastic clearance of bacteria
Source: eLife journal article supplement (doi:10.7554/elife.32976), 2018-03-05
Supplement: supp [file elife_poa_e32976_Figure_4_source_data_1.xlsx]

## Sheet: Fig. 4
Fig. 4A	Antibiotic concentration in MIC	Alone (LB)		Casamino		Chloramphenicol		Tetracycline
Rifampicin	0	0		0		0		0
	0.2	0.17415		0.57466		0.69442		0.73881
	0.4	0.7431		0.91357		0.99955		0.96957
	0.6	0.89443		0.99231		1		0.99942
	0.8	0.97324		0.99991		1		1
	1	0.9933		1		1		1
Cefsulodin	0	0		0		0		0
	0.16	0.07407		0.31671		0.14487		0.06905
	0.32	0.28661		1		0.38309		0.28095
	0.48	0.15896		1		0.94751		0.7381
	0.64	0.17593		1		0.99448		1
	0.8	0.42908		1		1		1
	1	1		1		1		1
Vancomycin	0	0		0		0		0
	0.2	0.26283		0.03185		0.65316		0.46631
	0.4	0.28858		0.38854		0.93258		0.82976
	0.6	0.64236		0.22293		0.99157		0.95779
	0.8	0.75911		0.26115		1		0.9904
	1	1		0.35287		1		0.99894
						--		--
Fig. 4B
Rifampicin	0	0		0		0		0
	0.17143	-0.03614		0.9728		0.44348		0.14286
	0.34286	0.5253		0.99808		0.95362		0.71429
	0.51429	0.88193		1		1		1
	0.68571	0.97831		1		1		1
	0.85714	0.99277		1		1		1
	1	1		1		1		1
Cefsulodin	0	0		0		0
	0.33333	-0.01242		0.72464		0.60762
	0.5	0.01863		0.98928		0.95619
	0.75	0.66531		1		1
	1	0.99863		1		1
Vancomycin	0	0		0		0		0
	0.2	0.17617		-0.00621		0.66812		0.69042
	0.4	0.28497		0.29503		0.79913		1
	0.6	0.62176		1		0.81659		1
	0.8	0.78238		1		1		1
	1	1		1		1		1
